# Supplementary material for: Impact of mobile phone delivered reminders and unconditional incentives on measles-containing vaccine timeliness and coverage: a randomised controlled trial in western Kenya
Source: PubMed Central journal article supplement (PMC7845730; doi:10.1136/bmjgh-2020-003357), 2021-01-28
Supplement: bmjgh-2020-003357supp001.pdf [file bmjgh-2020-003357supp001.pdf]

## Supplement

### Impact of mobile phone delivered reminders and unconditional incentives on measles-containing vaccine timeliness and coverage in western Kenya

Authors:

E. Wangeci Kagucia, PhD<sup>1</sup>; Benard Ochieng, MSc<sup>2</sup>; Joyce Were, BSc<sup>2</sup>; Kyla Hayford, PhD<sup>1</sup>; David Obor, MSc<sup>2</sup>; Katherine L O'Brien, MD<sup>1</sup>; Dustin G Gibson, PhD<sup>1</sup>

<sup>1</sup>Johns Hopkins Bloomberg School of Public Health, Department of International Health, Baltimore, MD, United States

<sup>2</sup>Kenya Medical Research Institute/Centers for Disease Control and Prevention Public Health and Research Collaboration, Kisumu, Kenya

Corresponding Author:

Eunice Kagucia, PhD

Johns Hopkins Bloomberg School of Public Health

615 North Wolfe Street

Baltimore, MD 21205

Phone: +1-617-281-4853

Email: ekagucia@jhu.edu

**Box S1:** SMS reminder content<sup>1</sup>

| Message Type                  | Message Timing                    | Arm 1: Control                                                                                                                    | Arm 2 : SMS Only                                                                                                                                                            | Arm 3 : SMS + 150 KES                                                                                                                                                       |
|-------------------------------|-----------------------------------|-----------------------------------------------------------------------------------------------------------------------------------|-----------------------------------------------------------------------------------------------------------------------------------------------------------------------------|-----------------------------------------------------------------------------------------------------------------------------------------------------------------------------|
| <b>Enrollment message</b>     | Enrollment                        | Thank you for enrolling Baby <BABY'S FIRST NAME> in M-SIMI study. The greatest wealth is health. This study is sponsored by KEMRI | Thank you for enrolling your child in the KEMRI M-SIMI study. You will get SMS reminders for Baby <BABY'S FIRST NAME>'s measles vaccination. The greatest wealth is health. | Thank you for enrolling your child in the KEMRI M-SIMI study. You will get SMS reminders for Baby <BABY'S FIRST NAME>'s measles vaccination. The greatest wealth is health. |
| <b>3 day reminder message</b> | Date of Birth + 9 months – 3 days | No message                                                                                                                        | Tell Mama <BABY'S FIRST NAME> that Measles vaccine is due this week. Most Gem babies get vaccinated, be one of them!                                                        | Tell Mama <BABY'S FIRST NAME> that Measles vaccine is due this week. We are sending 150ksh to assist with travel. Most Gem babies get vaccinated, be one of them!           |
| <b>1 day reminder message</b> | Date of Birth + 9 months – 1 day  | No message                                                                                                                        | Tell Mama <Baby Fname> that Measles vaccine is due this week. Go to the clinic if you haven't already. Vaccines save Kenyan babies lives.                                   | Tell Mama <Baby Fname> that Measles vaccine is due this week. Go to the clinic if you haven't already. Vaccines save Kenyan babies lives.                                   |

### Random allocation procedure

A list of 537 “Allocation IDs”, i.e., one unique ID for each study arm allocation, were generated. The study group associated with each Allocation ID followed the random sequence generated. Allocation IDs were placed into five groups, one for each of the five study-employed Community Interviewers (CIs) involved in screening and enrollment as below:

| Group 1                    | Group 2                    | Group 3                    | Group 4                    | Group 5                    |
|----------------------------|----------------------------|----------------------------|----------------------------|----------------------------|
| Allocation ID<br>1A – 108A | Allocation ID<br>1B – 108B | Allocation ID<br>1C – 107C | Allocation ID<br>1D – 107D | Allocation ID<br>1E – 107E |

The Allocation ID sequence (random allocation to study group) was maintained within each batch of Allocation IDs issued to CIs as below:

| Allocation ID | Study group in random sequence (example) |
|---------------|------------------------------------------|
| 1A            | SMS+150KES                               |
| 2A            | SMS+150KES                               |
| 3A            | Control                                  |
| 4A            | SMS only                                 |
| 5A            | Control                                  |
| 6A            | Control                                  |

The Allocation ID and study arm were printed on a card and placed into an opaque envelope which was labelled with only the Allocation ID and sealed as below:

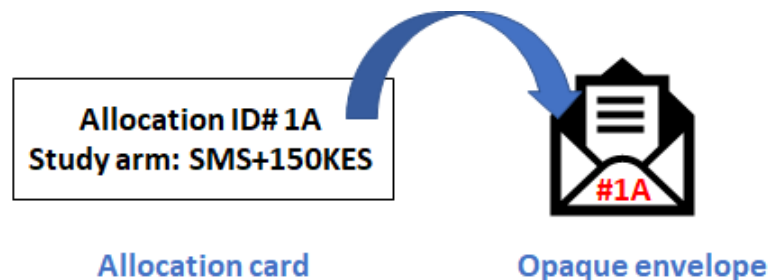

During the enrollment period, the site Principal Investigator (PI) provided CIs, who did not have access to the study group assignments, with a pre-defined number of allocation envelopes on a weekly basis as follows (example):

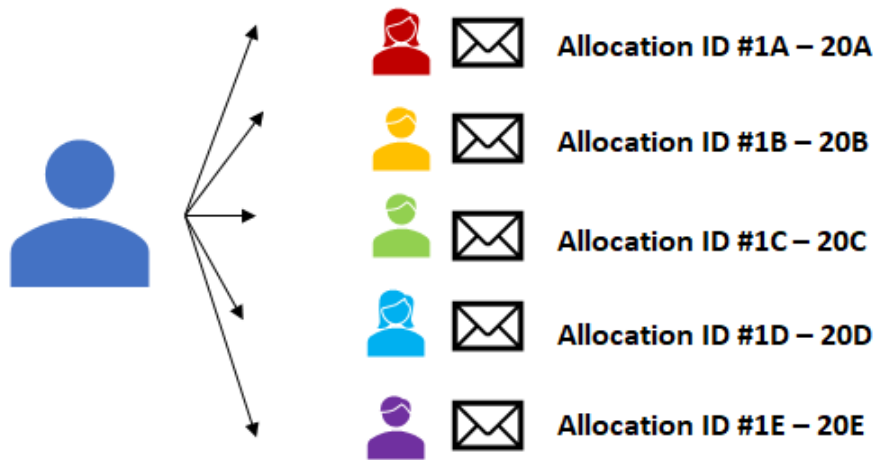

After determining that an infant was eligible for the study, the CI opened the allocation envelope to reveal the study arm. CIs opened each allocation envelope sequentially e.g., the allocation envelope labelled with Allocation ID #2A was opened after the allocation envelope labelled with Allocation ID #1A.

If a caregiver refused participation after the allocation envelope had been unsealed, the CI returned the unsealed allocation envelope to the PI. The Allocation ID of the unsealed envelope was then switched with that of a yet unused, sealed, randomly picked allocation envelope such that the study arm associated with the Allocation ID of the previously unsealed envelope had a chance of being different from the original study arm. Switching was performed to ensure that CIs continued to be blinded to the allocation sequence. The modified Allocation IDs and envelopes were then returned into circulation, as below:

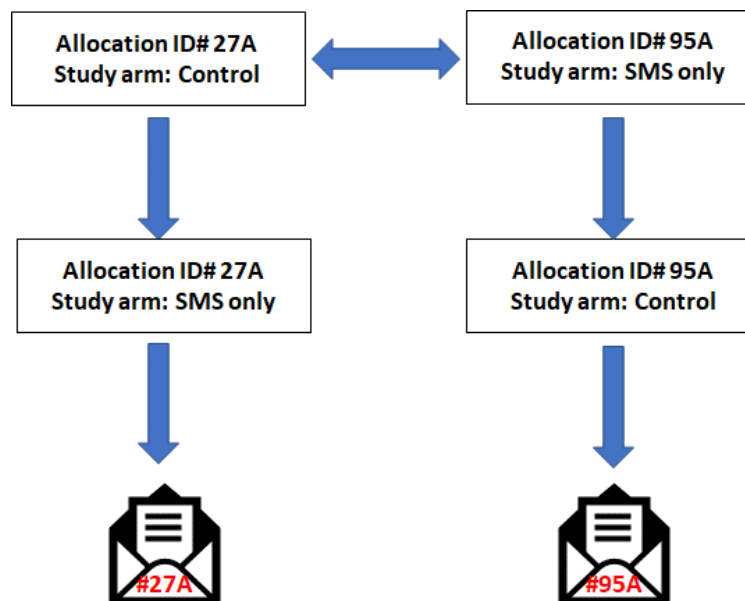

**Table S1.** Comparison of the distribution of baseline characteristics among infants in the analytic sample compared to excluded infants

|                                                                 | <b>Analytic sample<br/>(N= 455)</b> | <b>Verbal report<br/>(N= 24)</b> | <b>Lost to follow-up<br/>(N= 54)</b> | <b>Twins<br/>(N= 4)</b> | <b>All excluded<br/>(N= 82)</b> | <b>p-value*</b> |
|-----------------------------------------------------------------|-------------------------------------|----------------------------------|--------------------------------------|-------------------------|---------------------------------|-----------------|
|                                                                 | <b>No. (%)</b>                      | <b>No. (%)</b>                   | <b>No. (%)</b>                       |                         | <b>No. (%)</b>                  |                 |
| <b>Mobile phone access</b>                                      |                                     |                                  |                                      |                         |                                 |                 |
| Shares                                                          | 143 (31.4)                          | 7 (29.2)                         | 19 (35.2)                            | 0                       | 26 (31.7)                       | 0.960           |
| Owns                                                            | 312 (68.6)                          | 17 (70.8)                        | 35 (64.8)                            | 4 (100)                 | 56 (68.3)                       |                 |
| <b>Infant's sex</b>                                             |                                     |                                  |                                      |                         |                                 |                 |
| Female                                                          | 216 (47.5)                          | 9 (37.5)                         | 31 (57.4)                            | 3 (75.0)                | 43 (52.4)                       | 0.407           |
| Male                                                            | 239 (52.5)                          | 15 (62.5)                        | 23 (42.6)                            | 1 (25.0)                | 39 (47.6)                       |                 |
| <b>Infant's age at enrollment</b>                               |                                     |                                  |                                      |                         |                                 |                 |
| 6m                                                              | 292 (64.2)                          | 15 (62.5)                        | 32 (59.3)                            | 0                       | 47 (57.3)                       | 0.206           |
| 7m                                                              | 156 (34.3)                          | 9 (37.5)                         | 22 (40.7)                            | 4 (100)                 | 35 (42.7)                       |                 |
| 8m                                                              | 7 (1.5)                             | 0                                | 0                                    | 0                       | 0                               |                 |
| <b>Penta3 before enrollment<br/>(MCH card record only)</b>      |                                     |                                  |                                      |                         |                                 |                 |
| Not vaccinated                                                  | 18 (4.0)                            | 3 (13.0)                         | 3 (5.8)                              | 0                       | 6 (7.6)                         | 0.150           |
| Vaccinated                                                      | 437 (96.0)                          | 20 (87.0)                        | 49 (94.2)                            | 4 (100)                 | 73 (92.4)                       |                 |
| <b>Penta3 before enrollment<br/>(MCH card or verbal record)</b> |                                     |                                  |                                      |                         |                                 |                 |
| Not vaccinated                                                  | 18 (4.0)                            | 3 (12.5)                         | 3 (5.6)                              | 0                       | 6 (7.3)                         | 0.175           |
| Vaccinated                                                      | 437 (96.0)                          | 21 (87.5)                        | 51 (94.4)                            | 4 (100)                 | 76 (92.7)                       |                 |
| <b>Time to health facility</b>                                  |                                     |                                  |                                      |                         |                                 |                 |
| ≤30 minutes                                                     | 292 (64.2)                          | 12 (50.0)                        | 36 (66.7)                            | 2 (50.0)                | 50 (61.0)                       | 0.579           |
| >30 minutes                                                     | 163 (35.8)                          | 12 (50.0)                        | 18 (33.3)                            | 2 (50.0)                | 32 (39.0)                       |                 |
| <b>Maternal education</b>                                       |                                     |                                  |                                      |                         |                                 |                 |
| ≤7 years                                                        | 156 (34.3)                          | 10 (41.7)                        | 15 (27.8)                            | 2 (50.0)                | 27 (32.9)                       | 0.811           |
| >7 years                                                        | 299 (65.7)                          | 14 (58.3)                        | 39 (72.2)                            | 2 (50.0)                | 55 (67.1)                       |                 |
| <b>Birth order</b>                                              |                                     |                                  |                                      |                         |                                 |                 |
| Firstborn                                                       | 86 (18.9)                           | 7 (29.2)                         | 27 (50.0)                            | 0                       | 34 (41.5)                       | <0.001          |
| Later-born                                                      | 369 (81.1)                          | 17 (70.8)                        | 27 (50.0)                            | 4 (100)                 | 48 (58.5)                       |                 |
| <b>Location of last delivery</b>                                |                                     |                                  |                                      |                         |                                 |                 |
| At home                                                         | 83 (18.3)                           | 3 (12.5)                         | 10 (18.5)                            | 0                       | 13 (15.9)                       | 0.598           |
| Health facility                                                 | 371 (81.7)                          | 21 (87.5)                        | 44 (81.5)                            | 4 (100)                 | 69 (84.1)                       |                 |
| <b>Maternal age</b>                                             |                                     |                                  |                                      |                         |                                 |                 |
| ≤25 years                                                       | 228 (50.1)                          | 12 (50.0)                        | 42 (77.8)                            | 2 (50.0)                | 56 (68.3)                       | 0.002           |
| >25 years                                                       | 227 (49.9)                          | 12 (50.0)                        | 12 (22.2)                            | 2 (50.0)                | 26 (31.7)                       |                 |
| <b>Number of ANC visits for<br/>enrolled infant</b>             |                                     |                                  |                                      |                         |                                 |                 |
| ≤4 visits                                                       | 309 (68.2)                          | 17 (73.9)                        | 43 (79.6)                            | 4 (100)                 | 64 (79.0)                       | 0.051           |
| >4 visits                                                       | 144 (31.8)                          | 6 (26.1)                         | 11 (20.4)                            | 0                       | 17 (21.0)                       |                 |
| <b>Socioeconomic quintile</b>                                   |                                     |                                  |                                      |                         |                                 |                 |

|            | <b>Analytic sample<br/>(N= 455)</b> | <b>Verbal report<br/>(N= 24)</b> | <b>Lost to follow-up<br/>(N= 54)</b> | <b>Twins<br/>(N= 4)</b> | <b>All excluded<br/>(N= 82)</b> | <b>p-value*</b> |
|------------|-------------------------------------|----------------------------------|--------------------------------------|-------------------------|---------------------------------|-----------------|
|            | <b>No. (%)</b>                      | <b>No. (%)</b>                   | <b>No. (%)</b>                       |                         | <b>No. (%)</b>                  |                 |
| Bottom 40% | 179 (39.3)                          | 9 (37.5)                         | 27 (50.0)                            | 0                       | 36 (43.9)                       | 0.438           |
| Upper 60%  | 276 (60.7)                          | 15 (62.5)                        | 27 (50.0)                            | 4 (100)                 | 46 (56.1)                       |                 |

\*p-value for comparison of analytic sample to all excluded

**Table S2.** Univariate risk factor analysis for not receiving MCV1 by age 10 months among Control children

|                                                        | MCV1 status                        |                                 | cRR<br>(95% CI)       | p-value      |
|--------------------------------------------------------|------------------------------------|---------------------------------|-----------------------|--------------|
|                                                        | Not vaccinated<br>(N= 51)<br>n (%) | Vaccinated<br>(N= 109)<br>n (%) |                       |              |
| <b>Owns phone</b>                                      |                                    |                                 |                       |              |
| No                                                     | 21 (42.9)                          | 28 (57.1)                       | Ref                   |              |
| Yes                                                    | 30 (27.0)                          | 81 (73.0)                       | 1.28<br>(0.98, 1.67)  | <b>0.073</b> |
| <b>Infant's sex</b>                                    |                                    |                                 |                       |              |
| Female                                                 | 25 (32.5)                          | 52 (67.5)                       | Ref                   |              |
| Male                                                   | 26 (31.3)                          | 57 (68.7)                       | 1.02<br>(0.82, 1.26)  | 0.877        |
| <b>Infant's age at enrollment</b>                      |                                    |                                 |                       |              |
| 6m                                                     | 38 (36.5)                          | 66 (63.5)                       | Ref                   |              |
| 7-8m                                                   | 13 (23.2)                          | 43 (76.8)                       | 1.21<br>(0.99, 1.49)  | <b>0.068</b> |
| <b>Penta3 before enrollment (MCH card record only)</b> |                                    |                                 |                       |              |
| No                                                     | 4 (80.0)                           | 1 (20.0)                        | Ref                   |              |
| Yes                                                    | 47 (30.3)                          | 108 (69.7)                      | 3.48<br>(0.60, 20.17) | 0.164        |
| <b>Time to health facility</b>                         |                                    |                                 |                       |              |
| ≤30 minutes                                            | 36 (32.7)                          | 74 (67.3)                       | Ref                   |              |
| >30 minutes                                            | 15 (30.0)                          | 35 (70.0)                       | 1.04<br>(0.83, 1.30)  | 0.727        |
| <b>Maternal education</b>                              |                                    |                                 |                       |              |
| ≤7 years                                               | 21 (39.6)                          | 32 (60.4)                       | Ref                   |              |
| >7 years                                               | 30 (28.0)                          | 77 (72.0)                       | 1.19<br>(0.93, 1.53)  | 0.166        |
| <b>Birth order</b>                                     |                                    |                                 |                       |              |
| Firstborn                                              | 7 (21.2)                           | 26 (78.8)                       | Ref                   |              |
| Later-born                                             | 44 (34.6)                          | 83 (65.4)                       | 0.83<br>(0.67, 1.03)  | <b>0.092</b> |
| <b>Location of last delivery</b>                       |                                    |                                 |                       |              |
| At home                                                | 11 (36.7)                          | 19 (63.3)                       | Ref                   |              |
| Health facility                                        | 40 (31.0)                          | 89 (69.0)                       | 1.09<br>(0.81, 1.46)  | 0.571        |
| <b>Maternal age</b>                                    |                                    |                                 |                       |              |
| ≤25 years                                              | 23 (28.7)                          | 57 (71.3)                       | Ref                   |              |
| >25 years                                              | 28 (35.0)                          | 52 (65.0)                       | 0.91<br>(0.74, 1.13)  | 0.398        |
| <b>Number of ANC visits for enrolled infant</b>        |                                    |                                 |                       |              |

| <b>MCV1 status</b>            |                                             |                                          |                         |                |
|-------------------------------|---------------------------------------------|------------------------------------------|-------------------------|----------------|
|                               | <b>Not vaccinated<br/>(N= 51)<br/>n (%)</b> | <b>Vaccinated<br/>(N= 109)<br/>n (%)</b> | <b>cRR<br/>(95% CI)</b> | <b>p-value</b> |
| ≤4 visits                     | 40 (35.1)                                   | 74 (64.9)                                | Ref                     |                |
| >4 visits                     | 11 (23.9)                                   | 35 (76.1)                                | 1.17<br>(0.95, 1.45)    | 0.140          |
| <b>Socioeconomic quintile</b> |                                             |                                          |                         |                |
| Bottom 40%                    | 22 (30.6)                                   | 50 (69.4)                                | Ref                     |                |
| Upper 60%                     | 29 (33.0)                                   | 59 (67.0)                                | 0.96<br>(0.78, 1.19)    | 0.745          |



**Table S3.** Number and timing of SMS reminders by intervention study arm and overall

| SMS delivery                                           | SMS<br>N=146<br>n (%) | SMS+150KES<br>N=149<br>n (%) | Total<br>N=295<br>n (%) |
|--------------------------------------------------------|-----------------------|------------------------------|-------------------------|
| Per-protocol*                                          | 126 (86.3)            | 126 (84.6)                   | 252 (85.4)              |
| Not per-protocol                                       | 20 (13.7)             | 23 (15.4)                    | 43 (14.6)               |
| 3 reminders sent                                       | 0 (0)                 | 2 (8.7)                      | 2 (4.6)                 |
| Reminder before day of appointment not sent            | 7 (35.0)              | 7 (30.4)                     | 14 (32.5)               |
| Reminder three days before appointment not sent        | 4 (20.0)              | 7 (30.4)                     | 11 (25.6)               |
| Second reminder sent on day of appointment             | 7 (35.0)              | 6 (26.1)                     | 13 (30.2)               |
| Reminders sent 2 days before and on day of appointment | 1 (5.0)               | 0 (0)                        | 1 (2.3)                 |
| Reminders sent after appointment date                  | 1 (5.0)               | 1 (4.3)                      | 2 (4.8)                 |

\*Per-protocol SMS delivery = 2 reminders sent, one three days before and the other one day before scheduled vaccination date

**Table S4.** Distribution of timing of incentive payments relative to the scheduled vaccination date for SMS+150KES arm participants

| When M-PESA sent* | Number of participants (%) |
|-------------------|----------------------------|
| Day -3            | 91 (61.1)                  |
| Day -2            | 15 (10.1)                  |
| Day -1            | 21 (14.1)                  |
| Day 0             | 18 (12.1)                  |
| Day +1            | 1 (0.7)                    |
| Day +8            | 1 (0.7)                    |
| Day +10           | 1 (0.7)                    |
| Day +28           | 1 (0.7)                    |
| Total             | 149 (100)                  |

\*Reference point is scheduled vaccination date. For example, Day -3 is three days before scheduled vaccination date

**Table S5.** MCV1 uptake among infants of caregivers who cashed out the mMoney incentive

|                              | mMoney incentive cashed out |
|------------------------------|-----------------------------|
| <b>MCV1 by age 10 months</b> |                             |
| Yes                          | 83 (81%)                    |
| No                           | 20 (19%)                    |
| <b>MCV1 by age 12 months</b> |                             |
| Yes                          | 90 (87%)                    |
| No                           | 13 (13%)                    |

**Table S6.** MCV1 uptake and intervention effect sizes before and after the beginning of the nurses' strike

| <b>Before strike</b> |                      |                   |         |                                |                   |         |
|----------------------|----------------------|-------------------|---------|--------------------------------|-------------------|---------|
| Study arm            | MCV1 timely coverage | Adjusted RR       | p-value | MCV1 coverage by age 12 months | Adjusted RR       | p-value |
| Control (n= 160)     | 71% (86/ 121)        | Ref               | --      | 87% (47/ 54)                   | Ref               | --      |
| SMS (n= 146)         | 82% (94/ 115)        | 1.13 (0.99, 1.30) | 0.078   | 91% (39/ 43)                   | 1.05 (0.92, 1.20) | 0.462   |
| SMS+150 (n= 149)     | 80% (86/ 107)        | 1.14 (0.99, 1.32) | 0.064   | 88% (43/ 49)                   | 1.00 (0.87, 1.16) | 0.967   |
| <b>After strike</b>  |                      |                   |         |                                |                   |         |
| Study arm            | MCV1 timely coverage | Adjusted RR       | p-value | MCV1 coverage by age 12 months | Adjusted RR       | p-value |
| Control (n= 160)     | 59% (23/ 39)         | Ref               | --      | 74% (78/ 106)                  | Ref               | --      |
| SMS (n= 146)         | 65% (20/ 31)         | 1.10 (0.76, 1.60) | 0.614   | 82% (84/ 103)                  | 1.10 (0.95, 1.27) | 0.207   |
| SMS+150 (n= 149)     | 71% (30/ 42)         | 1.20 (0.86, 1.67) | 0.278   | 83% (83/ 100)                  | 1.14 (0.98, 1.31) | 0.081   |

**Table S7.** Effect of per-protocol transmission of mMoney incentives on MCV1 timely coverage

| mMoney transmission | N  | Number vaccinated (%) | Crude RR          | p-value |
|---------------------|----|-----------------------|-------------------|---------|
| Not per protocol    | 58 | 46 (79%)              | Ref               | --      |
| Per protocol*       | 91 | 70 (77%)              | 0.97 (0.82, 1.15) | 0.729   |

\*Per protocol= Incentive sent three days before the scheduled MCV1 date

**Table S8.** Effect of modified per-protocol transmission of mMoney incentives on MCV1 timely coverage

| mMoney transmission    | N   | Number vaccinated (%) | Crude RR          | p-value |
|------------------------|-----|-----------------------|-------------------|---------|
| Delayed                | 22  | 17 (77%)              | Ref               | --      |
| Modified per protocol* | 127 | 99 (78%)              | 1.01 (0.79, 1.29) | 0.944   |

\*Modified per protocol= Incentive sent before the scheduled MCV1 date

**Figure S1.** Incidence of MCV1 vaccination with time of origin as age at enrollment. Events are censored at age 365 days

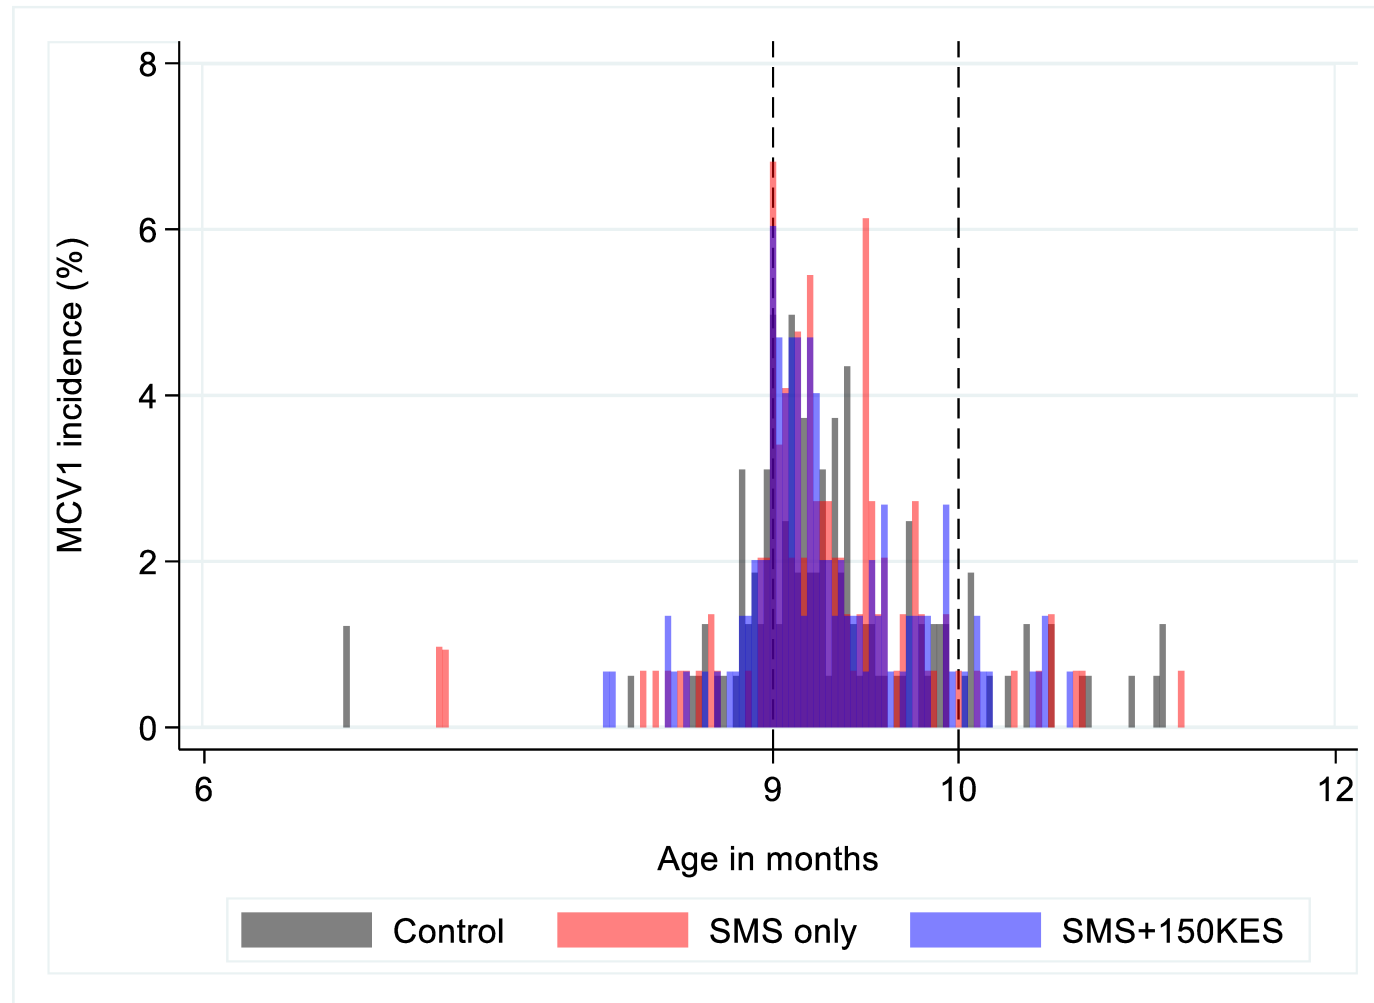

**Reference**

1. Gibson DG, Kagucia EW, Were J, Obor D, Hayford K, Ochieng B. Text Message Reminders and Unconditional Monetary Incentives to Improve Measles Vaccination in Western Kenya: Study Protocol for the Mobile and Scalable Innovations for Measles Immunization Randomized Controlled Trial. *JMIR Res Protoc*. 2019;8(7):e13221. doi:10.2196/13221
